# Supplementary material for: Clostridium perfringens α-Toxin Impairs Innate Immunity via Inhibition of Neutrophil Differentiation
Source: PubMed Central journal article supplement (PMC4910053; doi:10.1038/srep28192), 2016-06-16
Supplement: srep28192-s1.pdf [file srep28192-s1.pdf]

# ***Clostridium perfringens* $\alpha$ -Toxin Impairs Innate Immunity via**

## **Inhibition of Neutrophil Differentiation**

Masaya Takehara<sup>1,\*</sup>, Teruhisa Takagishi<sup>1</sup>, Soshi Seike<sup>1</sup>, Kaori Ohtani<sup>2,3</sup>, Keiko

Kobayashi<sup>1</sup>, Kazuaki Miyamoto<sup>1</sup>, Tohru Shimizu<sup>2</sup>, Masahiro Nagahama<sup>1,\*</sup>

<sup>1</sup>Department of Microbiology, Faculty of Pharmaceutical Sciences, Tokushima Bunri University, Yamashiro-cho, Tokushima 770-8514, Japan

<sup>2</sup>Department of Bacteriology, Graduate School of Medical Science, Kanazawa University, 13-1 Takara-Machi, Kanazawa, Ishikawa 920-8640, Japan

<sup>3</sup>Miyarisan Pharmaceutical Co., LTD, 1-10-3, Kaminakazato, Kita-ku, Tokyo 114-0016, Japan

\*Corresponding authors

E-mail: [mtakehara@ph.bunri-u.ac.jp](mailto:mtakehara@ph.bunri-u.ac.jp) (MT), and [nagahama@ph.bunri-u.ac.jp](mailto:nagahama@ph.bunri-u.ac.jp) (MN)

## **Table of Contents**

Supplementary Figures S1-S3

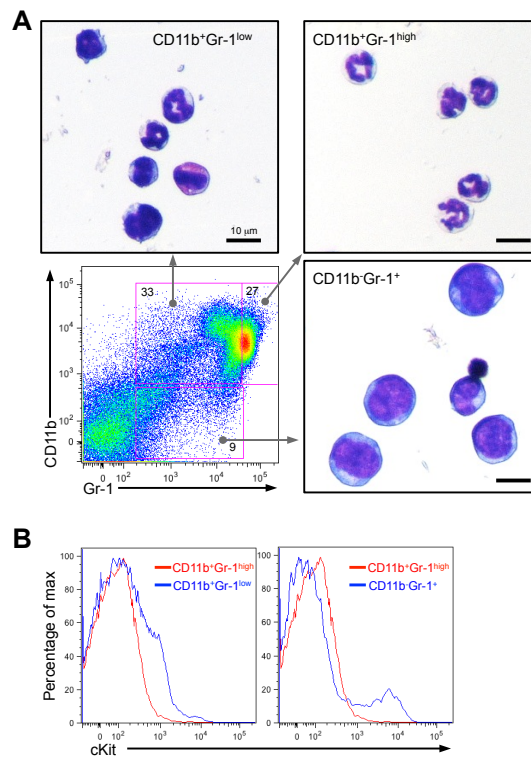

**Figure S1. Expression of CD11b and Gr-1 represents the stages of neutrophil maturation.** Bone marrow cells (BMCs) from C57BL/6 mice were labeled with specific antibodies against CD11b, Gr-1, and cKit. The cells were analyzed or sorted using a FACS Aria II. Three distinct populations were identified, and Giemsa staining of sorted CD11b<sup>+</sup>Gr-1<sup>high</sup>, CD11b<sup>+</sup>Gr-1<sup>low</sup>, and CD11b<sup>-</sup>Gr-1<sup>+</sup> cells was performed (A). The expression of cKit in the CD11b<sup>+</sup>Gr-1<sup>low</sup> and CD11b<sup>-</sup>Gr-1<sup>+</sup> cell populations (blue) was compared with that of the CD11b<sup>+</sup>Gr-1<sup>high</sup> cell population (red) (B).

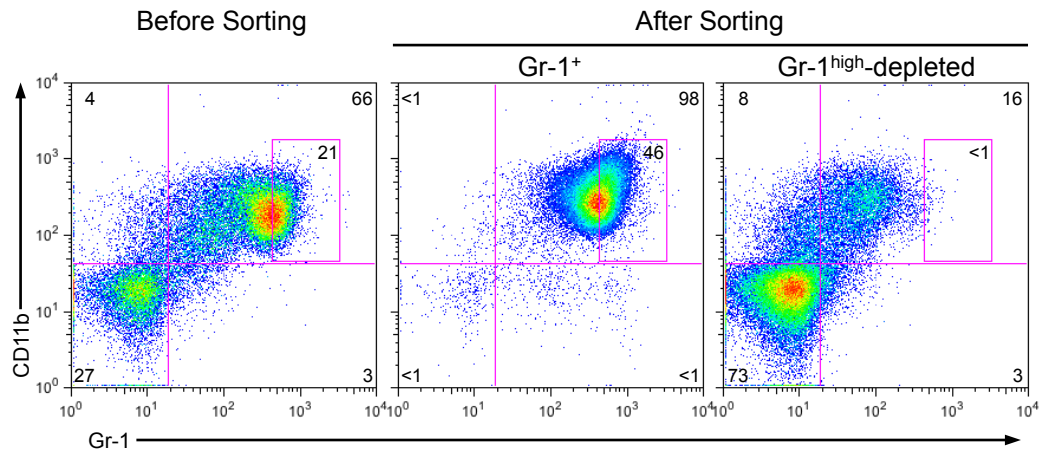

**Figure S2. Preparation of Gr-1<sup>+</sup> cells and CD11b<sup>+</sup>Gr-1<sup>high</sup> cell-depleted bone marrow cells.** Preparation of Gr-1<sup>+</sup> cells (Gr-1<sup>+</sup>) and CD11b<sup>+</sup>Gr-1<sup>high</sup> cell-depleted Bone marrow cells (BMCs) (Gr-1<sup>high</sup>-depleted) was performed using the EasySep system, as described in the Materials and Methods. Isolated cells were labeled with a specific antibody against CD11b, and flow cytometry analysis was performed using a Guava easyCyte. Almost all of the isolated Gr-1<sup>+</sup> cells co-expressed CD11b, which means that the isolated cells were CD11b<sup>+</sup>Gr-1<sup>+</sup> cells. CD11b<sup>+</sup>Gr-1<sup>high</sup> cell-depleted BMCs contained less than 1% of CD11b<sup>+</sup>Gr-1<sup>high</sup> cells.

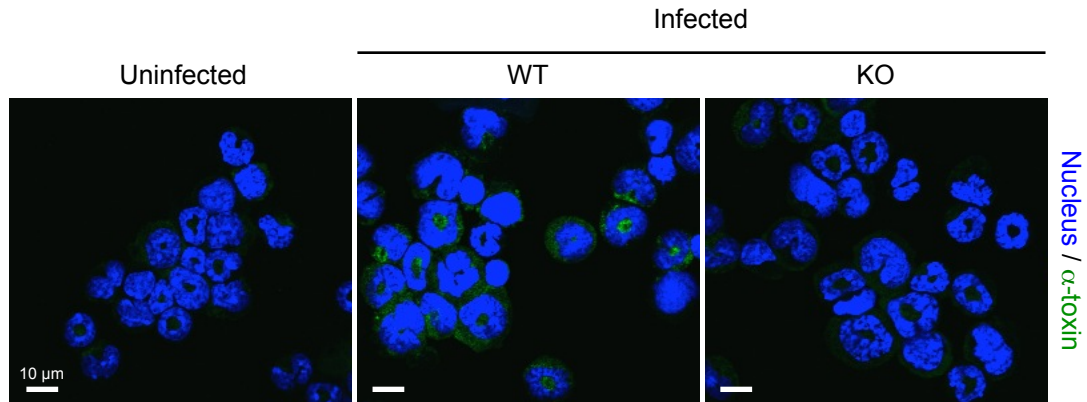

**Figure S3.  $\alpha$ -Toxin binds to bone marrow neutrophils in *Clostridium perfringens*-infected mice.** Mice were intramuscularly injected with  $1 \times 10^7$  CFU of *C. perfringens* Strain 13 (WT), PLC-KO (KO), or TGY medium as a control (uninfected), and bone marrow cells (BMCs) were isolated from the mice after 24 hours. Magnetically isolated Gr-1<sup>+</sup> cells from BMCs were incubated with an antibody against  $\alpha$ -toxin. After incubation with a secondary antibody, the cells were inspected by confocal laser scanning microscopy.
